1 Title:

2 Low prevalence of scabies and impetigo in Dakar/Senegal: a cluster-randomised, cross-  
3 sectional survey

| Symbol Legend |           |                                                             |
|---------------|-----------|-------------------------------------------------------------|
| Symbol        | Name      | Definition                                                  |
| &             | Ampersand | These authors are joint first authors                       |
| *             | Asterisk  | These authors are joint senior authors                      |
| §             | Paragraph | Current address is Hôpital Pitié-Salpêtrière, Paris, France |

4

5 Authors affiliation:

6 Andreas Hansmann<sup>1&</sup>, Genevia Wamba Lékémo<sup>2&</sup>, Chiaka Fomba<sup>2</sup>, Jade Kaddoura<sup>2</sup>,  
7 Ramatoullaye Toure<sup>2</sup>, Assane Diop<sup>2</sup>, Maodo Ndiaye<sup>3</sup>, Olivier Chosidow<sup>4§\*</sup>, Michael Marks<sup>5\*</sup>,  
8 Fatimata Ly<sup>2\*</sup>

9

10 1 University Hospital Bonn, Department of Neonatology and Paediatric Intensive Care  
11 Medicine, Bonn, Germany

12 2 Service de Dermatologie, Institut d'Hygiène Sociale, Université Cheikh Anta Diop, Dakar,  
13 Senegal

14 3 Hospital Aristide Le Dantec, Dakar, Senegal

15 4 Service de Dermatologie, Henri Mondor Hospital, Université Paris-Est, Créteil, Paris,  
16 France

17 5 Department of Clinical Research, London School of Hygiene and Tropical Medicine,  
18 London, United Kingdom

NOTE: This preprint reports new research that has not been certified by peer review and should not be used to guide clinical practice.

## 19 Abstract

20 *Background:* Scabies, a parasitic infection caused by *Sarcoptes scabiei var. hominis*, is a  
21 public health problem with significant morbidity worldwide, particularly in low-resource  
22 countries. Impetigo, a complication of scabies infection, is a risk factor for sepsis,  
23 glomerulonephritis and possibly acute rheumatic fever. Currently, the majority of  
24 epidemiological data has been collected in rural populations in the Pacific with limited  
25 applicability to urban populations in sub-Saharan Africa, where scabies is also believed to be  
26 a problem. To inform future public health programs more reliable information about the  
27 burden of disease is required.

28 *Methodology/Principal Findings:* In July/August 2022 we conducted a cross sectional,  
29 cluster-randomised, household survey in Pikine/Dakar using the 'International Association  
30 for the Control of Scabies (IACS)' criteria to diagnose scabies and impetigo. All participants  
31 underwent a standardised clinical examination by post-graduate dermatology students. For  
32 those diagnosed with scabies an age-adapted 'Dermatology Life Quality Index (DLQI)'  
33 questionnaire was filled.

34 We recruited and examined 1697 participants detecting 27 cases of scabies (prevalence:  
35 1.6%, 95% CI 0.8-3.2), mostly in school aged children. 10 participants suffered from  
36 impetigo (prevalence: 0.6%, 95% CI 0.3-1.3), 5 of which were dually infected with scabies.  
37 Risk factors for scabies infection were young age, male gender and koranic school  
38 attendance. Scabies had a large effect on the lives of 7 out of 22 cases (31.8%), who had  
39 DLQI questionnaires filled.

40 *Conclusions/Significance:* This study adds to the mapping of the burden of scabies across  
41 Africa to support public health action. With a low prevalence of scabies that is concentrated  
42 amongst poor households and children attending koranic schools a focused public health

43 approach targeting koranic schools and poor households seems to be most appropriate in  
44 this community.

45

## 46 Author's Summary

47 Caused by a mite, scabies is a very common skin infection transmitted between humans. It  
48 most commonly affects children in tropical countries and causes a severe itch leading to  
49 emotional distress and sometimes bacterial infections than can lead to severe illness.

50 Despite efforts in the past to reduce the burden from scabies at a population level a lack of  
51 knowledge about the distribution of the parasite hampers the design and implementation of  
52 larger control programs. In Africa, little is known about the burden and distribution of scabies,  
53 particularly in urban centres.

54 This study surveyed inhabitants of Dakar for scabies and bacterial skin infections. We  
55 randomly selected groups of houses in a low socio-economic status neighbourhood and  
56 invited all inhabitants of these houses for an interview and for a brief skin examination.

57 Of 1697 participants only 27 (1.6%) were found to have scabies, 5 of whom also suffered  
58 from impetigo, a bacterial skin infection. Most people with scabies were pupils in koranic  
59 schools suggesting they may be the setting of ongoing transmission. Further studies need to  
60 find reasons for the high burden amongst these pupils and how best to reduce the burden in  
61 these schools.

62

## 63 1. Introduction

64 Scabies is a parasitic skin infection caused by the *Sarcoptes scabiei var. hominis* mite. It is estimated  
65 that worldwide more than 200 million people live with scabies and 455 million new cases occur every  
66 year accounting for 4.5 million DALYs. (1) (2) (3) Whilst scabies is endemic worldwide, the largest  
67 burden is recorded in low-income, tropical countries with children and the poorest in society  
68 disproportionately affected. (4) (5)

69  
70 Scabies is transmitted predominantly through close skin-to-skin contact within households or in  
71 institutional settings. (6) Female mites burrow into the skin of the human host depositing eggs and  
72 excrement. (7) Intense itch occurs from three weeks after infection leading to distinctive skin eruptions.  
73 The intense itch, scratching and skin changes can lead to psychosocial consequences including shame,  
74 stigma, isolation, sleep disturbance and absenteeism from school or work. (8)

75 Scabies can also have serious health outcomes via bacterial superinfection ('impetiginisation of  
76 scabies') with *S. pyogenes* or *S. aureus*. This can contribute significantly to the burden of local and  
77 systemic bacterial infection, including necrotizing soft tissue infection, sepsis, post-streptococcal  
78 glomerulonephritis (9) (10) (11) (12) and possibly rheumatic fever and rheumatic heart disease (13)  
79 (14). Because scabies is so common and can cause potentially severe health outcomes through  
80 impetiginisation there has been renewed effort to control the disease.

81 In 2017 WHO added scabies to its list of Neglected Tropical Diseases (NTDs) and noted that mapping  
82 of the disease's prevalence needs to occur before large-scale activities associated with scabies  
83 prevention and control can begin. (15) To identify communities who would benefit from this intervention  
84 WHO advocates for a rapid mapping of scabies prevalence in suspected high-burden countries. (16).  
85 To standardize efforts the International Alliance for the Control of Scabies (IACS) published consensus  
86 criteria for the diagnosis of scabies in 2018. (17) (18). Initial evaluations have demonstrated the validity  
87 of these criteria. (19) (20) (21).

88 Geographically, most population prevalence surveys have been conducted in the Pacific and have  
89 frequently recorded very high prevalence rates amongst the general populations. (22) (23) (24) (25). In  
90 Africa, a community-wide survey in rural Malawi found scabies and impetigo prevalence rates of 15%

91 and 7% respectively. (26) In the Amhara Region of Ethiopia a population-based survey amongst  
92 children aged 5 to 14 years reported a scabies prevalence of 11%. (27) . In peri-urban Monrovia a  
93 population-based survey of scabies and impetigo recorded a scabies-prevalence of 9%, half of which  
94 was severe (52%). 1% of the population suffered from impetigo. (21) Surveys in Guinea Bissau and the  
95 Gambia have found a prevalence of scabies of 5 and 15 % respectively amongst children. (28) (29)

96 In Senegal, to our knowledge, no large population-based surveys of scabies or impetigo has been  
97 conducted in the past, though anecdotal evidence suggests a high burden of disease. A recent survey  
98 of 15 Koranic schools, called 'daaras', in Dakar found a prevalence of 7.3% amongst pupils, with a  
99 range from 2 to 31% between individual institutions. (30) Daaras are residential schools where students  
100 learn the Koran, at times in very crowded circumstances. Surveys in prisons and dermatologists  
101 practicing in public hospitals in Dakar confirm a high burden of scabies in their out-patient clinics (Ly,  
102 personal communication). We therefore undertook a cluster-randomised, cross-sectional survey  
103 employing a standardised diagnostic approach to diagnose scabies and impetigo in peri-urban Dakar.

104

105

## 106 2. Methods

107 The survey took place in Pikine, a neighbourhood of about 2 km x 3 km in size that lies 10 km outside  
108 the centre of Dakar, the capital of Senegal. Pikine is a very densely populated area of single and multi-  
109 story concrete and cement brick houses, arranged into a square grid by sand and tarmac streets. The  
110 mostly Wolof-speaking, multi-ethnic population is a mix of long-term residents and more recent arrivals.  
111 It is considered one of the poorer parts of Dakar but public services such as sanitation, waste removal  
112 and piped water are available to most inhabitants.

113 The border of Pikine was mapped using Google maps. Each block of houses was numbered (N = 530).  
114 We excluded 24 blocks of houses containing only large commercial or public buildings (17 blocks) or  
115 those, who were too large to be enlisted in a single day by the study team (7 blocks). We then randomly  
116 selected 27 housing blocks using simple random selection. The cluster size was selected to allow the  
117 study team to be able to visit all households and enlist all household members within the cluster in one  
118 full working day.

119 Two final year post-graduate dermatology students and two second-year post-graduate dermatology  
120 students from Université Cheikh Anta Diop Dakar were trained during a 2-day practical training course  
121 to diagnose scabies according to the IACS criteria (18). Community health volunteers accompanied the  
122 team and helped with translation where this was necessary.

123 During the household visit basic demographic and socio-economic data and a standardised history and  
124 examination for scabies and impetigo was conducted on all participants. The examination involved only  
125 the arms up to the axilla, exposed parts of the legs and the face. This has been shown to diagnose 90%  
126 of all scabies cases compared to a full body exam in a validation trial. (31) Health-related quality of life  
127 data was collected from individuals with scabies. All data was collected using ASUS Zenpad tablets  
128 and ODK (Open Data Kit) software.

129 A case of scabies was defined as fulfilling the 2020 IACS's criteria of either clinical scabies or suspected  
130 scabies. (18) Dermatoscopy or other methods of parasite identification were not available in this  
131 community trial to confirm the diagnosis in our participants. The severity of the presentation was  
132 classified by the number of lesions present as mild ( $\leq 10$  lesions), moderate (11-49 lesions) or severe

133 ( $\geq 50$  lesions or crusted scabies). (31) Impetigo was diagnosed on the basis of papular, pustular or  
134 ulcerative lesions with associated erythema, crusting, bullae or pus. Severity of impetigo was classified  
135 as very mild ( $\leq 5$  lesions), mild (6-10 lesions), moderate (11-49 lesions) or severe ( $\geq 50$  lesions) as  
136 described before. (31).

137 All patients found to have scabies or impetigo were provided treatment free of charge according to  
138 standard local treatment guidelines. Scabies was treated with weight based oral ivermectin on day 0  
139 and day 7, or topical benzyl benzoate 10% lotion for children with a weight of less than 15 kg. Impetigo  
140 was treated with oral antibiotics for 5 days and wound care. Symptomatic household contacts were also  
141 treated. Other moderate or severe dermatological conditions were referred for treatment.

142 Health-related quality of life was assessed using the Dermatology Quality of Life Index (DLQI) for  
143 those 16 years of age or older, the Children's DLQI (CDLQI) for children aged 7 to 15 years and the  
144 Family DLQI (FDLQI) for children 6 years or below. The DLQIs have been used previously for  
145 scabies, (32) are validated for use on tablets, (33) and validated translations into French are  
146 available. (34) Where French was not the mother tongue of the participant, the questions were read  
147 out and translated from French into Wolof by the fieldworkers or the community health volunteers.

148 Sample size calculations: We assumed that with a design-effect of 1.2 and an average cluster size of  
149 100 we needed to enrol 1600 individuals to detect a prevalence of scabies of 10% with 2% precision.  
150 Assuming an average household size of 5 we planned to enrol 16 clusters of 20 households. As the  
151 average cluster size was less than 100 participants, we increased the number of randomly selected  
152 clusters to 27 to meet our target of 1600 participants.

153 We calculated the prevalence of scabies and impetigo stratified by demographic variables. For  
154 children age was grouped in steps of 5-years until the age of twenty. The remaining adult population  
155 was summarised in a single age category. The education of the head of the household was  
156 categorised as either no schooling, schooling up to partial secondary school education or at least  
157 secondary school education. The type of school was categorised as either Koranic school or any  
158 other school. Household size was defined as how many people slept in the house the previous night.  
159 The svyset STATA command was used to adjust for the cluster randomized sampling design. For  
160 proportions robust standard errors were used to calculate confidence intervals adjusted for clustering



161 at the community level. Logistic regression analysis was done using random-effects regression  
162 adjusted for clustering as above. Due to the small number of outcomes univariate modelling was  
163 chosen for key socio-demographic variables to avoid overfitting of the model. The relationship  
164 between HRQOL and scabies was assessed by calculating the FDLQI, CDLQI and DLQI according to  
165 age. Median scores and inter-quartile ranges (IQR) were used to quantify the effect on the QOL. The  
166 impact of scabies on the quality of life was assessed as no effect on patient's life (DLQI scores 0–1),  
167 small effect on patient's life (2-5), moderate effect on patient's life (6-10), very large effect on patient's  
168 life (11-20) and extremely large effect on patient's life (21-30). (35) Stata SE 17.0 (StataCorp, College  
169 Station, TX) was used for data analysis.

170 The study was approved by the LSHTM MSc Research Ethics Committee (Ref. No. 27220) and the  
171 'Comité National d'Éthique pour la Recherche en Santé (CNERS)' ethics committee in Senegal  
172 (Protocol SEN22/03). The study was introduced to and approved by key public health officials in Pikine,  
173 the area of study and the 'Department of Neglected Tropical Diseases' at the Ministry of Health and  
174 Social Action of the Republic of Senegal. Written informed consent was obtained for each subject or  
175 from their parent or legal guardian.

176

### 177 3. Results

178 Between July 19<sup>th</sup> and August 5<sup>th</sup> 2022 1697 participants from 392 households were enrolled (see figure  
179 1 + 2). The study period fell in the national school holidays and at the start of the rainy season.

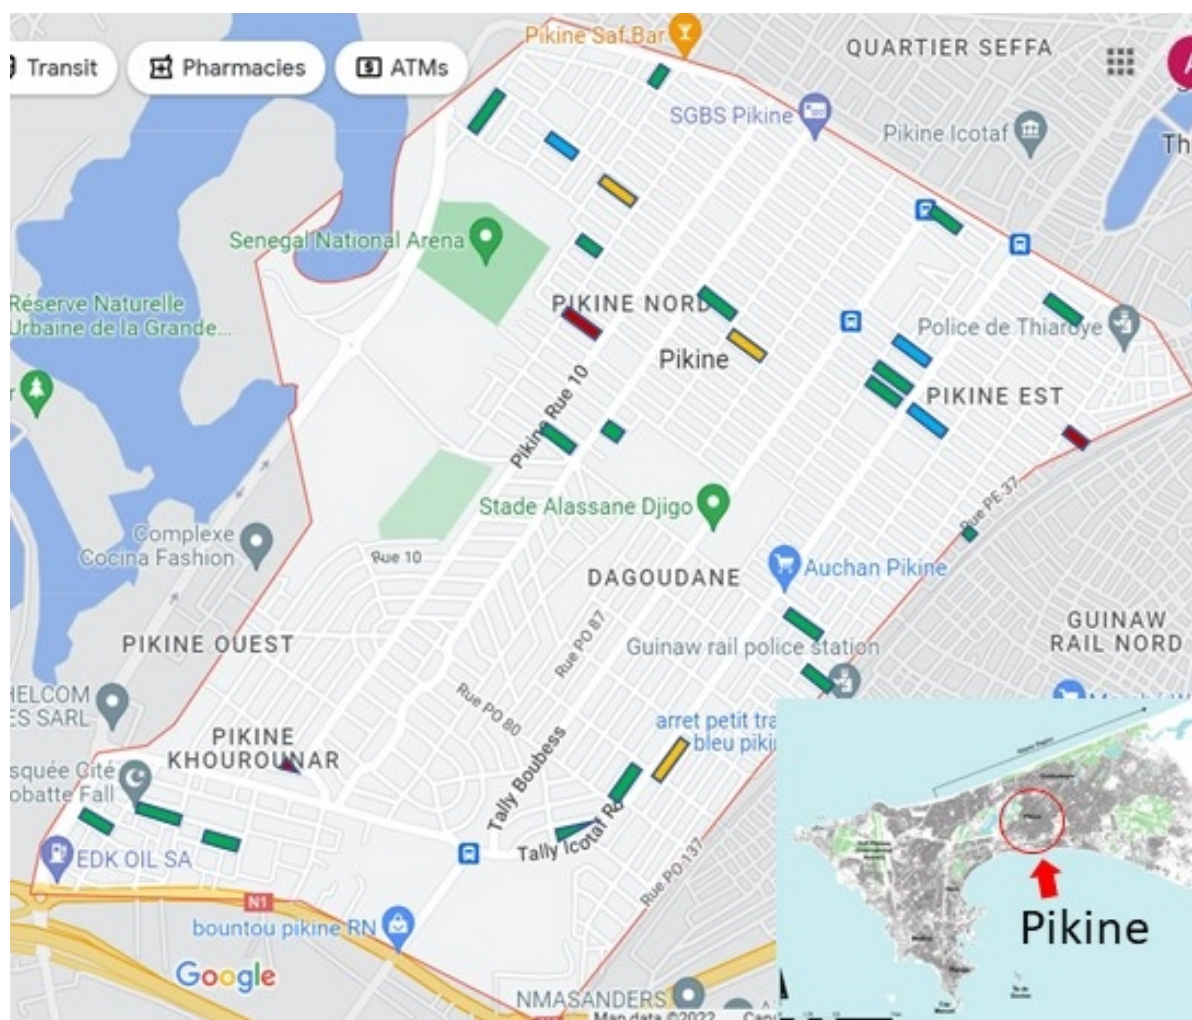

180  
181 *Fig. 1: map of Pikine, a suburb of Dakar, the most Western point of Africa, showing the 27 randomly*  
182 *selected clusters, color-coded for different levels of scabies prevalence in the respective clusters, from*  
183 *which participants were recruited: green: no scabies, blue: >0-2% scabies, yellow: >2-4% scabies, red:*  
184 *>4-8.5% scabies*

185

186

187

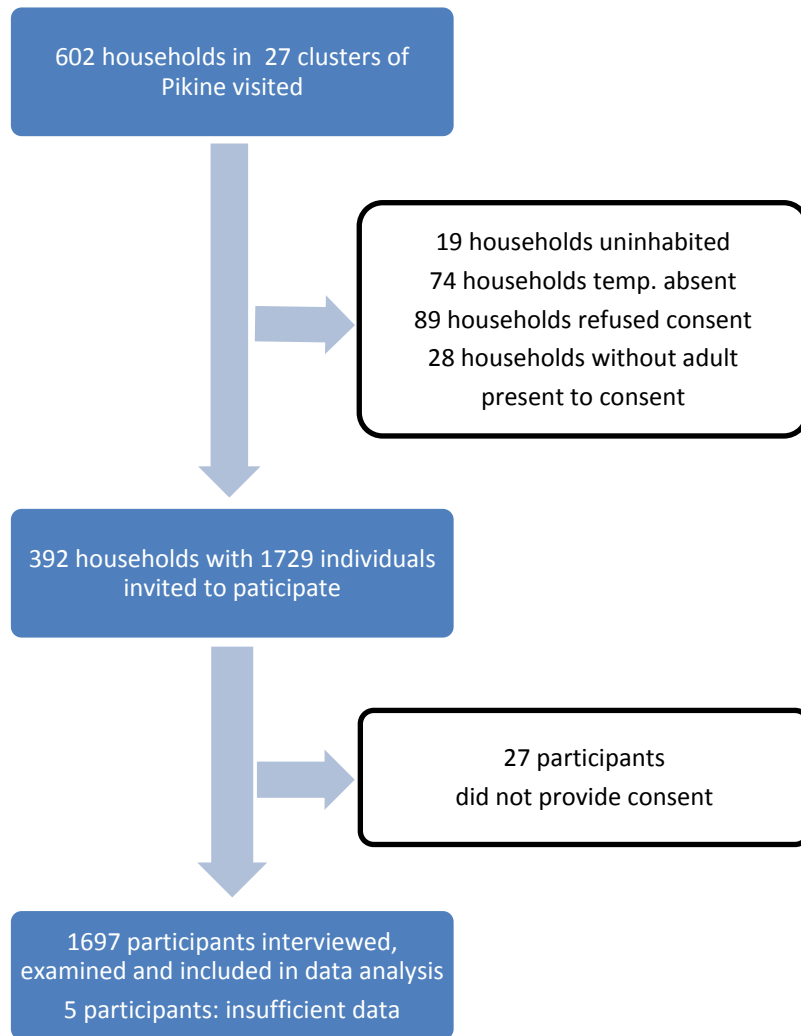

188

189 *Fig. 2: Flow chart of recruitment for scabies and impetigo survey in Pikine, a suburb of Dakar, Senegal*

190

191 1207 (71.1%) participants were female. There was a broadly equal distribution of male and female  
192 participants in early childhood but a skewed distribution towards female participants was observed in  
193 working-age adults. The median age of the participants was 19 years (IQR 8 – 37 years). The majority  
194 of the population were Wolof, Fulani and Serer. The educational attainment for the head of households  
195 was generally low with 47.8 % not having attended any formal school and 36.9 % had not completed  
196 secondary school. (Table 1)

197

198

199 *Table 1: Age and gender of participants*

| <b>Household Data</b>                                                                     |                                                  |                    |
|-------------------------------------------------------------------------------------------|--------------------------------------------------|--------------------|
|                                                                                           |                                                  | <b>N (%)</b>       |
| <b>Median Household Size</b><br><b>N = 367 (IQR)</b>                                      |                                                  | <b>6 (4, 9)</b>    |
| <b>Education of head of household (N=358)</b>                                             | <b>-No formal education</b>                      | <b>171 (47.8)</b>  |
|                                                                                           | <b>-School education up to partial secondary</b> | <b>132 (36.9)</b>  |
|                                                                                           | <b>-Secondary school education or higher</b>     | <b>55 (15.4)</b>   |
| <b>Ethnicity of Head of Household (N=387)</b>                                             | <b>Wolof</b>                                     | <b>155 (40.1)</b>  |
|                                                                                           | <b>Fulani</b>                                    | <b>78 (20.2)</b>   |
|                                                                                           | <b>Serer</b>                                     | <b>57 (14.7)</b>   |
|                                                                                           | <b>Other</b>                                     | <b>97 (25.1)</b>   |
| <b>Participant Data</b>                                                                   |                                                  |                    |
|                                                                                           | <b>Category</b>                                  | <b>N (%)</b>       |
| <b>Gender</b>                                                                             | <b>Male</b>                                      | <b>490 (28.9)</b>  |
|                                                                                           | <b>Female</b>                                    | <b>1207 (71.1)</b> |
| <b>Age group</b>                                                                          | <b>Age 0 to &lt;5 yrs</b>                        | <b>258 (15.2)</b>  |
|                                                                                           | <b>Age 5 to &lt;10 yrs</b>                       | <b>222 (13.1)</b>  |
|                                                                                           | <b>Age 10 to &lt;15 yrs</b>                      | <b>209 (12.3)</b>  |
|                                                                                           | <b>Age 15 to &lt;20 yrs</b>                      | <b>178 (10.5)</b>  |
|                                                                                           | <b>Age &gt;20 yrs</b>                            | <b>830 (48.9)</b>  |
| <b>Current place of education of participants who were enrolled as students (N = 588)</b> | <b>Non-Koranic School</b>                        | <b>539 (91.7)</b>  |
|                                                                                           | <b>Koranic School</b>                            | <b>49 (8.3)</b>    |
| <b>Total</b>                                                                              |                                                  | <b>1697 (100%)</b> |

200

201 Overall, 27 people (1.6% 95% CI 0.8-3.2%) were diagnosed with scabies. Of these 26 were diagnosed

202 as clinical scabies and one as suspected scabies (C1). Amongst the male population the scabies

203 prevalence was 2.8% compared to 1.1% in females (adjusted odds ratio (OR) 3.1, 95% CI 1.4-6.8, p  
 204 <0.01). The prevalence of scabies between the 27 clusters ranged from 0% to 8.5%. Amongst the  
 205 different age categories, scabies was most prevalent amongst school-aged children between the ages  
 206 of 5 and 10 years (4.5%) compared to 0.4% in the adult population. (Table 3). Of the 27 cases of scabies  
 207 11 were mild (40.7%), 3 were of moderate severity (11.1%) and 13 were severe (48.1%).

208 A total of 10 participants were diagnosed with impetigo (0.6%, 95% CI 0.3-1.3%). Of these 5 also had  
 209 scabies. The severity of impetigo was classified as very mild in 5 cases and mild in the remaining 5  
 210 cases. Overall, 9 of the 10 cases (90%) were diagnosed in boys.

211 *Table 3. Scabies and impetigo prevalence by age category, gender, school type and education of*  
 212 *head of household*

|                                  | Participa<br>nts No<br>(%) | Cases<br>with<br>scabie<br>s<br>N (%) | Adjusted<br>odds ratio<br>(95% CI)* | p-value* | Cases<br>with<br>impetigo<br>No (%) | Adjusted<br>odds ratio<br>(95% CI)* | p-value* |
|----------------------------------|----------------------------|---------------------------------------|-------------------------------------|----------|-------------------------------------|-------------------------------------|----------|
| <b>Age 0-&lt;5<br/>yrs.</b>      | 258 (15.2)                 | 6<br>(2.3)                            | 6.7<br>(1.6-27.5)                   | <0.01    | 3<br>(1.2)                          | 9.9<br>(1.0-96.3)                   | 0.05     |
| <b>Age 5-&lt;10<br/>yrs.</b>     | 222 (13.1)                 | 10<br>(4.5)                           | 12.1<br>(3.2-45.4)                  | <0.01    | 4<br>(1.8)                          | 14.2<br>(1.6-129.7)                 | 0.02     |
| <b>Age 10 to<br/>&lt;15 yrs.</b> | 209 (12.3)                 | 7<br>(3.3)                            | 9.1<br>(2.3-36.4)                   | <0.01    | 2<br>(1.0)                          | 7.8<br>(0.7-87.8)                   | 0.10     |
| <b>Age 15 to<br/>&lt;20 yrs.</b> | 178 (10.4)                 | 1<br>(0.6)                            | 1.5<br>(0.1-14.4)                   | 0.74     | 0<br>(-)                            | -                                   | -        |
| <b>Age &gt;20<br/>yrs.</b>       | 830 (48.9)                 | 3<br>(0.4)                            | 1                                   | -        | 1<br>(0)                            | 1                                   | -        |
| <b>Total</b>                     | <b>1697</b>                | <b>27<br/>(1.6)</b>                   | <b>(0.8-3.2)</b>                    | -        | <b>10<br/>(0.6)</b>                 | <b>(0.3-1.3)</b>                    | -        |
| <b>Male</b>                      | 490 (28.9)                 | 14<br>(2.8)                           | 3.1<br>(1.4-6.8)                    | <0.01    | 9<br>(1.8)                          | 25<br>(3.1-200.5)                   | <0.01    |
| <b>Female</b>                    | 1207<br>(71.1)             | 13<br>(1.1)                           | 1                                   | -        | 1<br>(0%)                           | 1                                   | -        |
| <b>Participant<br/>attending</b> | 49<br>(2.9)                | 10<br>(20.4)                          | 17.6<br>(6.0-52.1)                  | <0.01    | 3                                   | 16.8<br>(2.4-118.5)                 | <0.01    |

|                                             |            |          |               |      |         |                |      |
|---------------------------------------------|------------|----------|---------------|------|---------|----------------|------|
| <b>Koranic school</b>                       |            |          |               |      |         |                |      |
| <b>Participant attending regular school</b> | 539 (31.8) | 8 (1.5)  | 1             | -    | 2       | 1              | -    |
| <b>Household head with any education</b>    | 701 (41.3) | 7 (1.0)  | 0.5 (0.2-1.3) | 0.16 | 2 (0.3) | 0.61 (0.1-3.3) | 0.57 |
| <b>Household head without education</b>     | 702 (41.4) | 18 (2.6) | 1             | -    | 6 (0.9) | 1              | -    |

213 \* using logistic regression analysis corrected for cluster sampling design

214 The prevalence of scabies was higher amongst children attending koranic schools compared to non-  
 215 koranic schools (20.4% vs 1.5%, OR 17.6 95% CI 6.0-52.1, p <0.01). There was no significant  
 216 association between the education of household heads and the presence of scabies or impetigo in  
 217 participants (Table 3). Household size was not associated with scabies.

218 For participants who completed a DLQI the median score was 10.00 (IQR 8-12), for participants who  
 219 completed a CDLQI the median score was 8.75 (IQR 4.5-13) and for participants where a FDLQI score  
 220 was completed the median was 5.83 (IQR 2-10). As the number of cases was small we did not stratify  
 221 by disease severity.

## 222 4. Discussion

223 In this study we found a relatively low prevalence of scabies and impetigo in a peri-urban region of  
 224 Dakar. Cases of scabies were not evenly distributed in the population and were much more common in  
 225 school-aged male children, in particular those who attended Koranic schools. These data suggest that  
 226 transmission of scabies in the general population is relatively limited and that most cases occur from  
 227 transmission within specific facilities or locations such as schools, e.g. Koranic.

228 The prevalence of scabies seen in this study are lower than that reported in a survey in Monrovia in  
 229 Liberia and a second survey in Sukuta in The Gambia. (20)(29) Both of these surveys had a prevalence

230 of scabies that approached 10% in the general population suggesting that in these settings there was  
231 more generalized transmission of scabies. In the absence of any recent health interventions to reduce  
232 the burden of disease in Pikine, there are several possible reasons for this difference. First, the GDP  
233 per capita in Senegal is about twice that of The Gambia and three times as high compared to Liberia.  
234 Second, scabies is associated with crowding and it is conceivable that living conditions in Pikine are  
235 less crowded. Third, it may be that the population in Pikine has better access to preventive or  
236 therapeutic health services than inhabitants in Monrovia or Sukuta. In addition, there may be other  
237 unknown geographic, seasonal, socio-economic or public health reasons for the low burden of disease  
238 which we were unable to explore.

239 We found that the health-related QOL impact of scabies on peoples' lives was mild to moderate which  
240 is broadly in line with previous studies. (36)(8)(37) As the total number of cases of scabies was low, our  
241 ability to assess relationships between disease severity and quality of life measures was limited.

242 Compared to the overall study population we found a very high rate of scabies infection in pupils  
243 attending Koranic schools compared to attendants of non-Koranic schools. As a result, individuals  
244 attending Koranic schools made up more than one third of all cases with scabies despite representing  
245 less than 3% of participants. We have previously shown a high prevalence of scabies amongst children  
246 at Koranic schools. (30) The increased rate of scabies seen in male participants likely reflects this  
247 increased burden amongst attendees at Koranic schools. Our data suggest targeted interventions may  
248 be the most effective strategy to reduce the burden of scabies in these settings.

249 Our study has a number of strengths including a large sample size, the use of a robust cluster-  
250 randomised sampling approach and the use of standardized examinations using the IACS criteria  
251 performed by well trained staff. The entire period of recruitment fell into the school summer holidays in  
252 Senegal, which allowed us to recruit a larger part of the school-aged children at home. There are also  
253 a number of limitations, given the nature of the fieldwork, we did not perform dermatoscopy or other  
254 direct visualisation methods. However, the performance of the clinical IACS criteria has previously  
255 been shown to be acceptable at the population level and we do not think this will have impacted our  
256 findings. We undertook a cross-sectional survey and cannot exclude that seasonal variations might  
257 occur as has been shown for impetigo in The Gambia (29). Despite best efforts to enroll all members

258 of each household recruitment took place during working hours only, resulting in an under  
259 representation of adult men, which has also been seen in other studies. (20)

260

261 In summary we found a relatively low overall prevalence of scabies in the general population but  
262 evidence of much higher levels of transmission in particular environments, notably Koranic schools.  
263 Our data highlight the need for scabies prevalence surveys to consider not only the overall population  
264 prevalence but also specific sub-populations where targeted interventions may be required. Further  
265 studies specifically involving Koranic schools, including intervention studies should be considered.



## 266 Acknowledgements

267 -We thank all families who participated in the study.

268 -Mrs. Awa Dieye, Mrs. Nogaye Diouf, Mrs. Marema Ndiaye, Mr. Mame Thiano Seye and Mrs.

269 Aissatou Gaye Fall, community health workers and matron at Centre de Santé Dominique in Pikine,

270 helped with the conduct of the field work and translations.

271 -Chrissy Roberts from the London School of Hygiene and Tropical Medicine Global Health Analytics

272 kindly provided electronic data solutions.

273

## 274 Reference List

- 275 1. Vos T, Allen C, Arora M, Barber RM, Brown A, Carter A, et al. Global, regional,  
276 and national incidence, prevalence, and years lived with disability for 310  
277 diseases and injuries, 1990–2015: a systematic analysis for the Global Burden  
278 of Disease Study 2015. *Lancet*. 2016;388(10053):1545–602.
- 279 2. Vos T, Abajobir AA, Abbafati C, Abbas KM, Abate KH, Abd-Allah F, et al.  
280 Global, regional, and national incidence, prevalence, and years lived with  
281 disability for 328 diseases and injuries for 195 countries, 1990–2016: A  
282 systematic analysis for the Global Burden of Disease Study 2016. *Lancet*.  
283 2017;390(10100):1211–59.
- 284 3. WHO. Ending the neglect to attain the Sustainable Development Goals: a road  
285 map for neglected tropical diseases 2021–2030. World Health Organization.  
286 2020. 196 p.
- 287 4. Romani L, Steer AC, Whitfield MJ, Kaldor JM. Prevalence of scabies and  
288 impetigo worldwide: A systematic review. *Lancet Infect Dis* [Internet].  
289 2015;15(8):960–7. Available from: [http://dx.doi.org/10.1016/S1473-](http://dx.doi.org/10.1016/S1473-3099(15)00132-2)  
290 [3099\(15\)00132-2](http://dx.doi.org/10.1016/S1473-3099(15)00132-2)
- 291 5. Gibbs S. Skin disease and socioeconomic conditions in rural Africa: Tanzania.  
292 *Int J Dermatol*. 1996;35(9):633–9.
- 293 6. Chosidow O. Scabies. *N Engl J Med*. 2006;6(354):1718–27.
- 294 7. Heukelbach J, Feldmeier H. Scabies. *Lancet*. 2006;367(9524):1767–74.
- 295 8. Worth C, Heukelbach J, Fengler G, Walter B, Liesenfeld O, Feldmeier H.  
296 Impaired quality of life in adults and children with scabies from an  
297 impoverished community in Brazil. *Int J Dermatol*. 2012;51(3):275–82.
- 298 9. Thean LJ, Jenney A, Engelman D, Romani L, Wand H, Mudaliar J, et al.  
299 Hospital admissions for skin and soft tissue infections in a population with  
300 endemic scabies: A prospective study in Fiji, 2018–2019. *PLoS Negl Trop Dis*  
301 [Internet]. 2020;14(12):e0008887. Available from:  
302 <http://dx.doi.org/10.1371/journal.pntd.0008887>
- 303 10. Whittle HC, Abdullahi MT, Fakunle F, Parry EHO, Rajkovic AD, Ibrahim A, et  
304 al. Scabies, pyoderma and nephritis in Zaria, Nigeria. A clinical and  
305 epidemiological study. *Trans R Soc Trop Med Hyg*. 1973;67(3):349–63.
- 306 11. Svartman M, Finklea JF, Earle DP, Potter EV P-KT. Epidemic scabies and  
307 acute glomerulonephritis in Trinidad. *Lancet*. 1972;1:249–51.
- 308 12. Marshall CS, Cheng AC, Markey PG, Towers RJ, Richardson LJ, Fagan PK, et  
309 al. Acute post-streptococcal glomerulonephritis in the Northern Territory of  
310 Australia: A review of 16 years data and comparison with the literature. *Am J*  
311 *Trop Med Hyg*. 2011;85(4):703–10.
- 312 13. Thornley S, Marshall R, Jarrett P, Sundborn G, Reynolds E, Schofield G.  
313 Scabies is strongly associated with acute rheumatic fever in a cohort study of

- 314 Auckland children. *J Paediatr Child Health*. 2018;54(6):625–32.
- 315 14. Thornley S, King R, Marshall R, Oakley A, Sundborn G, Harrower J, et al. How  
316 strong is the relationship between scabies and acute rheumatic fever? An  
317 analysis of neighbourhood factors. *J Paediatr Child Health*. 2020;56(4):600–6.
- 318 15. WHO. Report of the Tenth Meeting of the WHO Strategic and Technical  
319 Advisory Group for Neglected Tropical Diseases [Internet]. Geneva; 2017.  
320 Available from: [https://www.who.int/docs/default-source/ntds/strategic-and-](https://www.who.int/docs/default-source/ntds/strategic-and-advisory-group-on-neglected-tropical-diseases-(stag-ntds)/tenth-ntd-stag-report-2017.pdf?sfvrsn=9ec99065_2)  
321 [advisory-group-on-neglected-tropical-diseases-\(stag-ntds\)/tenth-ntd-stag-](https://www.who.int/docs/default-source/ntds/strategic-and-advisory-group-on-neglected-tropical-diseases-(stag-ntds)/tenth-ntd-stag-report-2017.pdf?sfvrsn=9ec99065_2)  
322 [report-2017.pdf?sfvrsn=9ec99065\\_2](https://www.who.int/docs/default-source/ntds/strategic-and-advisory-group-on-neglected-tropical-diseases-(stag-ntds)/tenth-ntd-stag-report-2017.pdf?sfvrsn=9ec99065_2)
- 323 16. Engelman D, Cantey PT, Marks M, Solomon AW, Chang AY, Chosidow O, et  
324 al. The public health control of scabies: priorities for research and action.  
325 *Lancet* [Internet]. 2019;394(10192):81–92. Available from:  
326 [http://dx.doi.org/10.1016/S0140-6736\(19\)31136-5](http://dx.doi.org/10.1016/S0140-6736(19)31136-5)
- 327 17. Engelman D, Fuller LC, Steer AC. Consensus criteria for the diagnosis of  
328 scabies: A Delphi study of international experts. *PLoS Negl Trop Dis* [Internet].  
329 2018;12(5):1–9. Available from: <http://dx.doi.org/10.1371/journal.pntd.0006549>
- 330 18. Engelman D, Yoshizumi J, Hay RJ, Osti M, Micali G, Norton S, et al. The 2020  
331 International Alliance for the Control of Scabies Consensus Criteria for the  
332 Diagnosis of Scabies. *Br J Dermatol*. 2020;183(5):808–20.
- 333 19. Amoako YA, Phillips RO, Arthur J, Abugri MA, Akowuah E, Amoako KO, et al.  
334 A scabies outbreak in the north east region of Ghana: The necessity for  
335 prompt intervention. *PLoS Negl Trop Dis* [Internet]. 2020;14(12):1–12.  
336 Available from: <http://dx.doi.org/10.1371/journal.pntd.0008902>
- 337 20. Collinson S, Timothy J, Zayzay SK, Kollie KK, Lebas E, Candy N, et al. The  
338 prevalence of scabies in Monrovia, Liberia: A population-based survey. *PLoS*  
339 *Negl Trop Dis* [Internet]. 2020;14(12):e0008943. Available from:  
340 <http://dx.doi.org/10.1371/journal.pntd.0008943>
- 341 21. Walker SL, Collinson S, Timothy J, Zayay S, Kollie KK, Lebas E, et al. A  
342 community-based validation of the international alliance for the control of  
343 scabies consensus criteria by expert and non-expert examiners in liberia.  
344 *PLoS Negl Trop Dis* [Internet]. 2020;14(10):1–11. Available from:  
345 <http://dx.doi.org/10.1371/journal.pntd.0008717>
- 346 22. Romani L, Koroivueta J, Steer AC, Kama M, Kaldor JM, Wand H, et al.  
347 Scabies and Impetigo Prevalence and Risk Factors in Fiji: A National Survey.  
348 *PLoS Negl Trop Dis*. 2015;9(3):1–10.
- 349 23. Mason DS, Marks M, Sokana O, Solomon AW, Mabey DC, Romani L, et al.  
350 The Prevalence of Scabies and Impetigo in the Solomon Islands: A  
351 Population-Based Survey. *PLoS Negl Trop Dis*. 2016;10(6):1–10.
- 352 24. M Harris 1, D Nako, T Hopkins, D M Powell, C Kenny, C Carroll KC. Skin  
353 infections in Tanna, Vanuatu in 1989. *P N G Med J*. 1992;35(2):137–43.
- 354 25. R J Eason TT-J. Resurgent yaws and other skin diseases in the Western

- 355 Province of the Solomon Islands. *P N G Med J.* 1985;28(4):247–50.
- 356 26. Galván-Casas C, Mitjá O, Esteban S, Kafulafula J, Phiri T, Navarro-Fernández  
357 Í, et al. A facility and community-based assessment of scabies in rural malawi.  
358 *PLoS Negl Trop Dis.* 2021;15(6):1–11.
- 359 27. Misganaw B, Nigatu SG, Gebrie GN, Kibret AA. Prevalence and determinants  
360 of scabies among school-age children in Central Armachiho district, Northwest,  
361 Ethiopia. *PLoS One [Internet].* 2022;17(6):e0269918. Available from:  
362 <http://dx.doi.org/10.1371/journal.pone.0269918>
- 363 28. Marks M, Sammut T, Cabral MG, Silva ET Da, Goncalves A, Rodrigues A, et  
364 al. The prevalence of scabies, pyoderma and other communicable dermatoses  
365 in the Bijagos Archipelago, Guinea-Bissau. *PLoS Negl Trop Dis.*  
366 2019;13(11):1–9.
- 367 29. Armitage EP, Senghore E, Darboe S, Barry M, Camara J, Bah S, et al. High  
368 burden and seasonal variation of paediatric scabies and pyoderma prevalence  
369 in the Gambia: A cross-sectional study. *PLoS Negl Trop Dis [Internet].*  
370 2019;13(10):1–16. Available from:  
371 <http://dx.doi.org/10.1371/journal.pntd.0007801>
- 372 30. Ly F, Faye A, Wone I, Lelo S, Diouf A, Koundio A, et al. Scabies in Koranic  
373 schools in Dakar, Senegal: Prevalence and risk factors. *Int J Dermatology,*  
374 *Venereol Lepr Sci.* 2021;4(2):49–54.
- 375 31. Marks M, Engelman D, Romani L, Mason D, Sokana O, Kama M, et al.  
376 Exploration of a simplified clinical examination for scabies to support public  
377 health decision-making. *PLoS Negl Trop Dis [Internet].* 2018;12(12):1–9.  
378 Available from: <http://dx.doi.org/10.1371/journal.pntd.0006996>
- 379 32. Thanushah B, Nilaweera A, Junejo MH, Patel J, Oyebanji O. GD07: The use of  
380 the Dermatology Life Quality Index suite of patient-reported outcome  
381 measures in neglected tropical diseases of the skin: a systematic review. *Br J*  
382 *Dermatol.* 2022;187(S1):179–80.
- 383 33. Ali FM, Johns N, Finlay AY, Salek MS, Piguet V. Comparison of the paper-  
384 based and electronic versions of the Dermatology Life Quality Index: evidence  
385 of equivalence. *Br J Dermatol.* 2017;177(5):1306–15.
- 386 34. No Title [Internet]. Available from:  
387 <https://www.cardiff.ac.uk/medicine/resources/quality-of-life->  
388 [questionnaires/dermatology-life-quality-index#:~:text=The DLQI is calculated](https://www.cardiff.ac.uk/medicine/resources/quality-of-life-)  
389 [by,affected by their skin disease.](https://www.cardiff.ac.uk/medicine/resources/quality-of-life-)
- 390 35. Hongbo Y, Thomas CL, Harrison MA, Salek MS, Finlay AY. Translating the  
391 science of quality of life into practice: What do dermatology life quality index  
392 scores mean? *J Invest Dermatol [Internet].* 2005;125(4):659–64. Available  
393 from: <http://dx.doi.org/10.1111/j.0022-202X.2005.23621.x>
- 394 36. Walker SL, Lebas E, De Sario V, Deyasso Z, Doni SN, Marks M, et al. The  
395 prevalence and association with health-related quality of life of tungiasis and  
396 scabies in schoolchildren in southern Ethiopia. *PLoS Negl Trop Dis.*

397 2017;11(8):1–11.

398 37. Lake SJ, Engelman D, Sokana O, Nasi T, Boara D, Marks M, et al. Health-  
399 related quality of life impact of scabies in the Solomon Islands. *Trans R Soc*  
400 *Trop Med Hyg.* 2022;116(2):148–56.

401
